# Supplementary material for: Human genome diversity data reveal that L564P is the predominant TPC2 variant and a prerequisite for the blond hair associated M484L gain-of-function effect
Source: PLoS Genet. 2021 Jan 19;17(1):e1009236. doi: 10.1371/journal.pgen.1009236 (PMC7845996; doi:10.1371/journal.pgen.1009236)
Supplement: S1 Table — In the GWAS catalog four TPC2 polymorphism are listed that reach significant association in genome-wide association studies. The “OR” refers to the allelic odds ratio in each study. Further details can be found in the respective publications. (XLSX) [file pgen.1009236.s009.xlsx]

## Sheet: Sheet1
	Substitution	SNP ID	Codon change	P value	Effect	Trait	PMID
	V219I	rs72928978	V [GTC] > I [ATC]	6 x 10-48	1.391	Brown vs. black hair color	30531825
				2 x 10-8	0.952	Type 2 diabetes (adjusted for BMI)	29632382
				5 x 10-7	0.952	Type 2 diabetes	29632382
	K376R	rs3750965	K [AAA] > R [AGA]	3 x 10-7	-	Hair color	20585627
	M484L	rs35264875	M [ATG] > L [TTG]	4 x 10-30	2.49	Blond vs. brown hair color	18488028
				2 x 10-6	0.935	Type 2 diabetes	29632382
	G734E	rs3829241	G [GGG] > E [GAG]	5 x 10-188	1.269	Blond vs. brown/black hair color	30531825
				3 x 10-63	-	Heel bone mineral density	30595370
				8 x 10-62	-	Heel bone mineral density	30598549
				9 x 10-51	-	Heel bone mineral density	30048462
				5 x 10-21	-	Heel bone mineral density	28869591
				6 x 10-13	-	Heel bone mineral density (women)	28869591
				2 x 10-9	-	Heel bone mineral density (men)	28869591
